# Supplementary material for: Application of novel silica stabilized on a covalent triazine framework as a highly efficient heterogeneous and recyclable catalyst in the effective green synthesis of porphyrins
Source: Royal Society of Chemistry journal article supplement (doi:10.1039/d4ra07875f), 2025-01-01
Supplement: d4ra07875f1.pdf [file d4ra07875f1.pdf]

## Supporting Information

### **Application of novel silica stabilized on covalent triazine framework as a highly efficient heterogeneous and recyclable catalyst in the effective green synthesis of porphyrins**

Azin Kharazmi,<sup>a</sup> Ramin Ghorbani-Vaghei,<sup>\*,a,b</sup> Ardeshir Khazaei,<sup>a</sup> Idris Karakaya,<sup>c</sup> and Rahman Karimi-Nami<sup>d</sup>

<sup>a</sup>Department of Organic Chemistry, Faculty of Chemistry and Petroleum Sciences, Bu-Ali Sina University, Hamedan 6517838683, Iran.

<sup>b</sup>Department of Organic Chemistry, Faculty of Chemistry, University of Guilan, Rasht, Iran

<sup>c</sup>Department of Chemistry, College of Basic Sciences, Gebze Technical University, 41400 Gebze, Türkiye.

<sup>d</sup>Department of Chemistry, Faculty of Science, University of Maragheh, P.O Box 55181-83111, Maragheh, Iran.

*\*Corresponding author: Phone: +989183122123; Fax: +988138380709; E-mail address: rgvaghei@yahoo.com & [ghorbani@basu.ac.ir](mailto:ghorbani@basu.ac.ir)*

## Table of contents

| <i>Section</i>                                              | <i>Page number</i> |
|-------------------------------------------------------------|--------------------|
| <i>Copies of FT-IR, NMR and HR-Mass spectra of products</i> | <i>S3-S20</i>      |

S1. Copies of NMR spectra of aldehyde, amine, TPT-TAT/silica (entries 1-3)

S1-1. 2,4,6-tris(4-formylphenoxy)-1,3,5-triazine (1a)

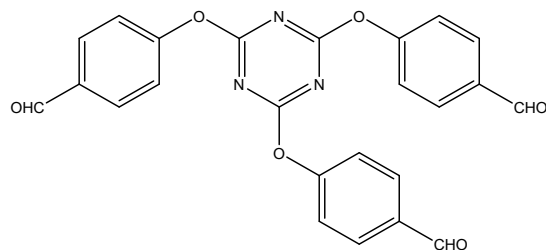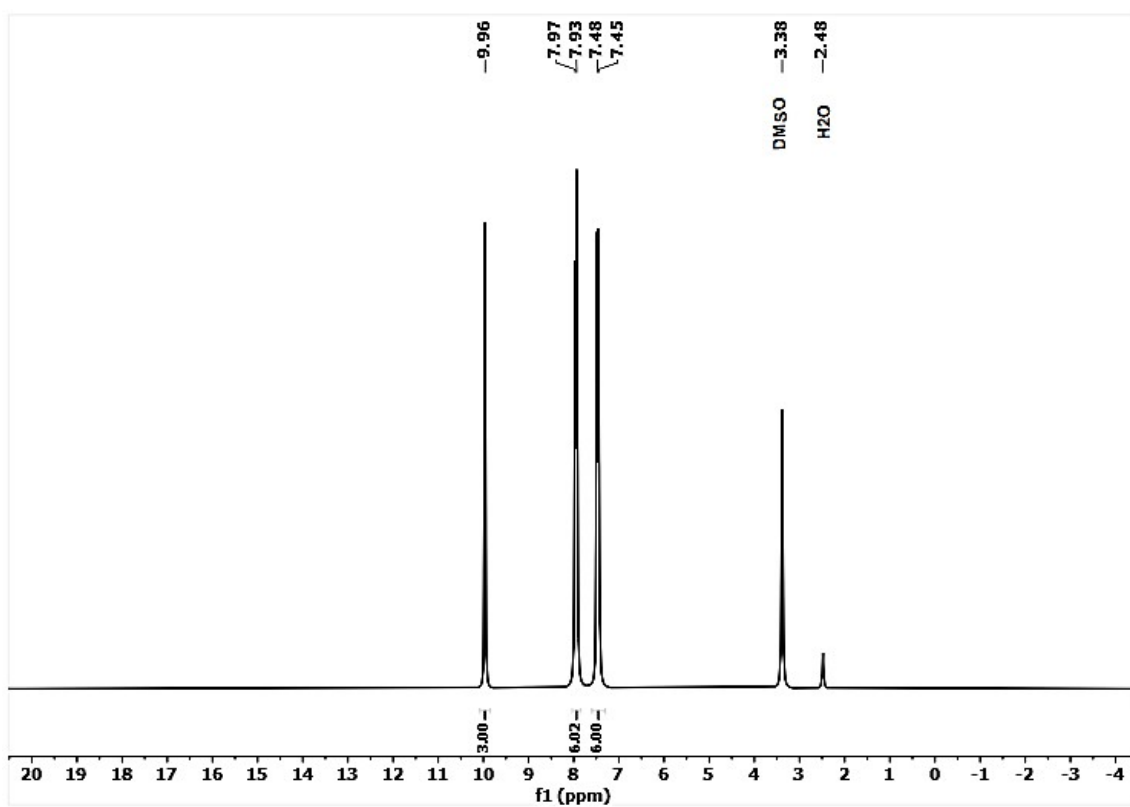

Figure S1. <sup>1</sup>H NMR spectra of 2,4,6-tris(4-formylphenoxy)-1,3,5-triazine (1a).

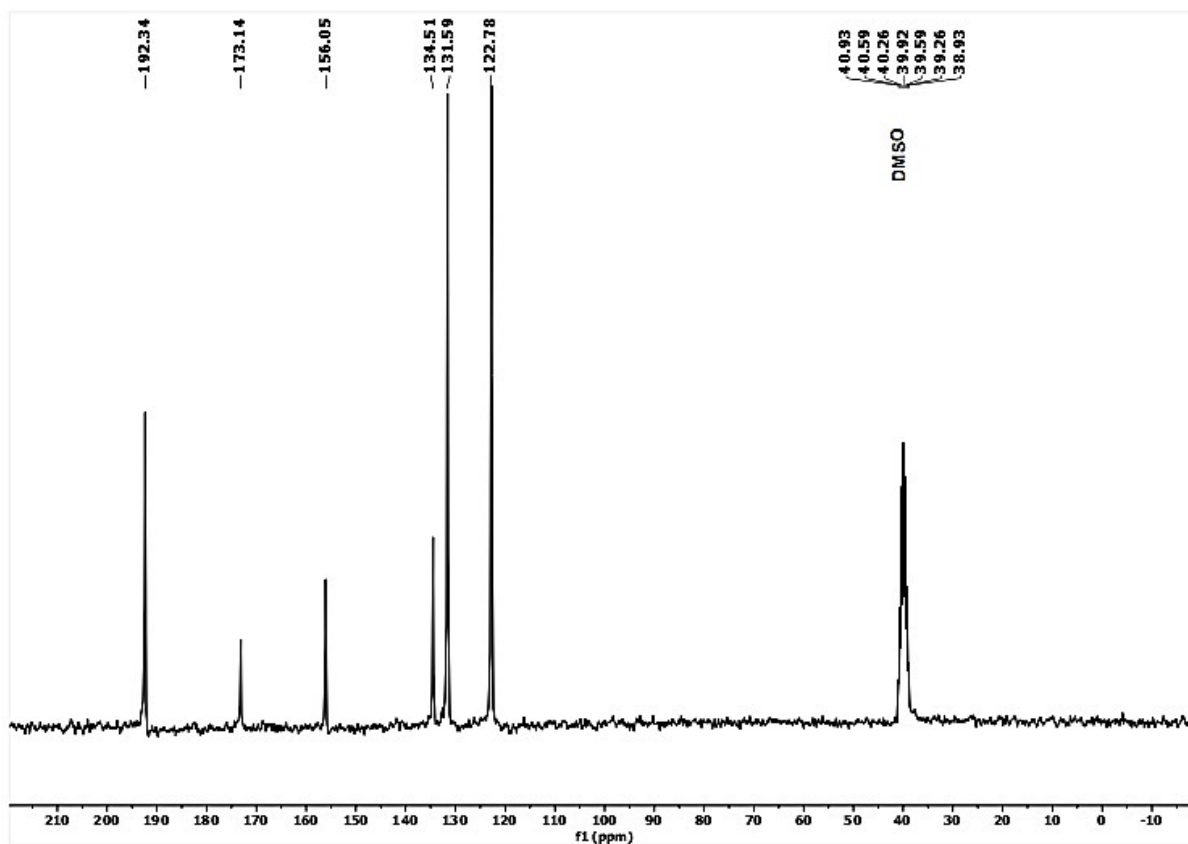

Figure S2.  $^{13}\text{C}$  NMR spectra of 2,4,6-tris(4-formylphenoxy)-1,3,5-triazine (1a).

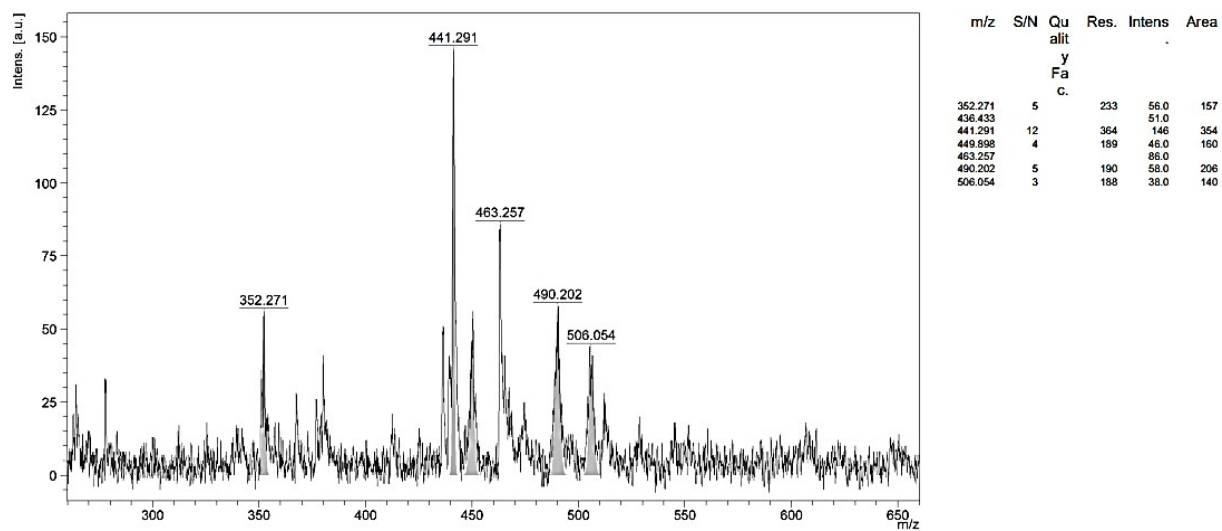

Figure S3. HR-Mass spectra of 2,4,6-tris(4-formylphenoxy)-1,3,5-triazine (1a).

S1-2.  $N^2, N^4, N^6$ -tris(4-(aminomethyl) benzyl)-1,3,5-triazine-2,4,6-triamine (2a)

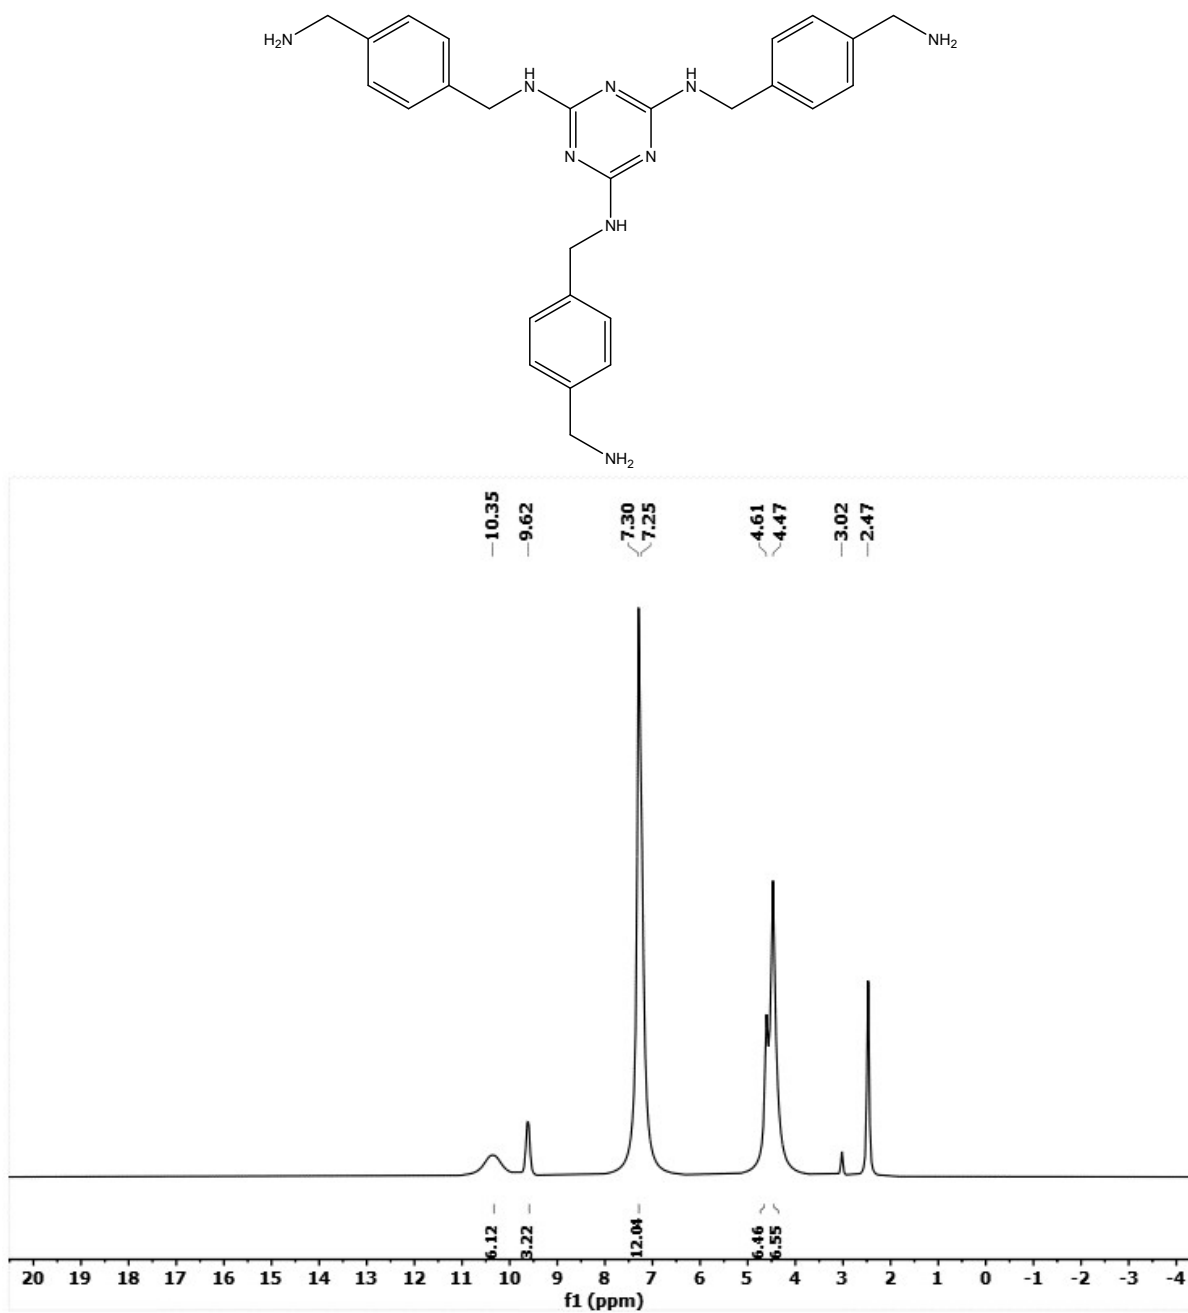

Figure S4.  $^1\text{H NMR}$  spectra of  $N^2, N^4, N^6$ -tris(4-(aminomethyl) benzyl)-1,3,5-triazine-2,4,6-triamine (2a).

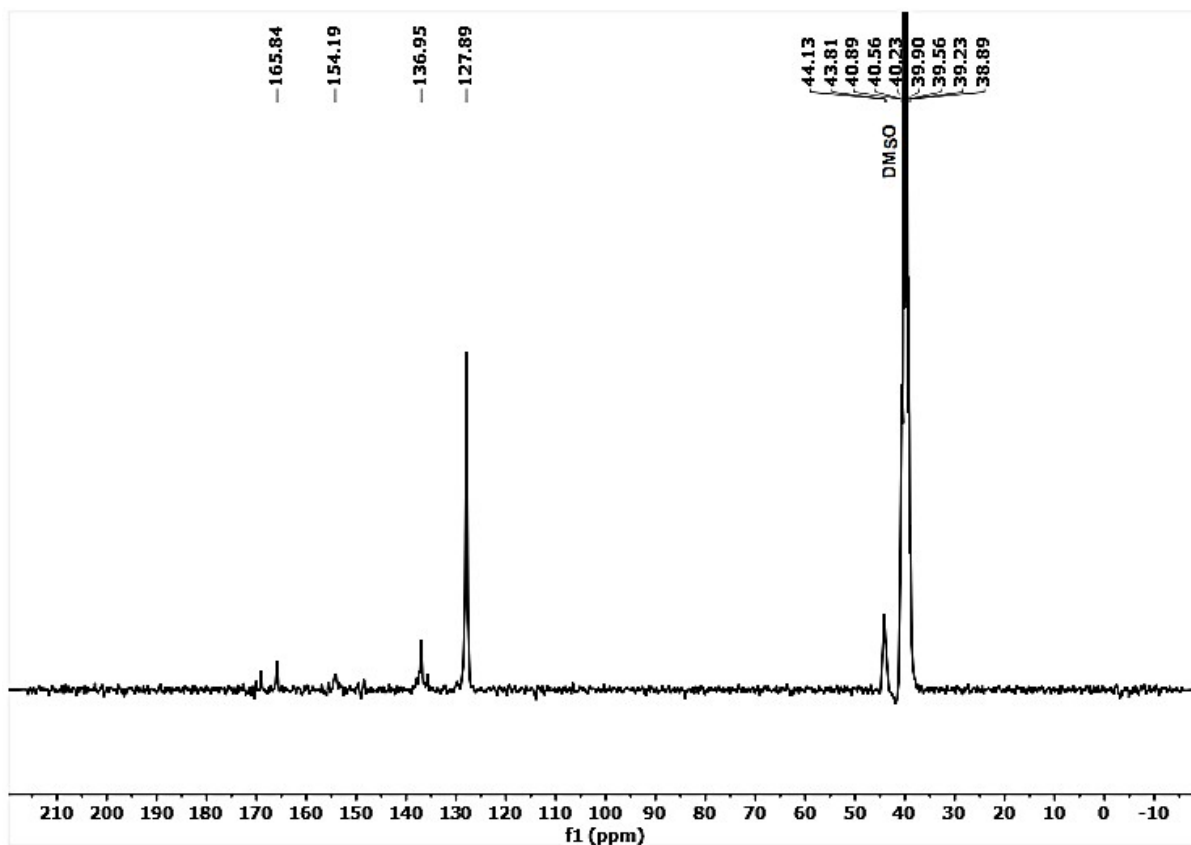

Figure S5.  $^{13}\text{C}$  NMR spectra of  $N^2, N^4, N^6$ -tris(4-(aminomethyl) benzyl)-1,3,5-triazine-2,4,6-triamine (2a).

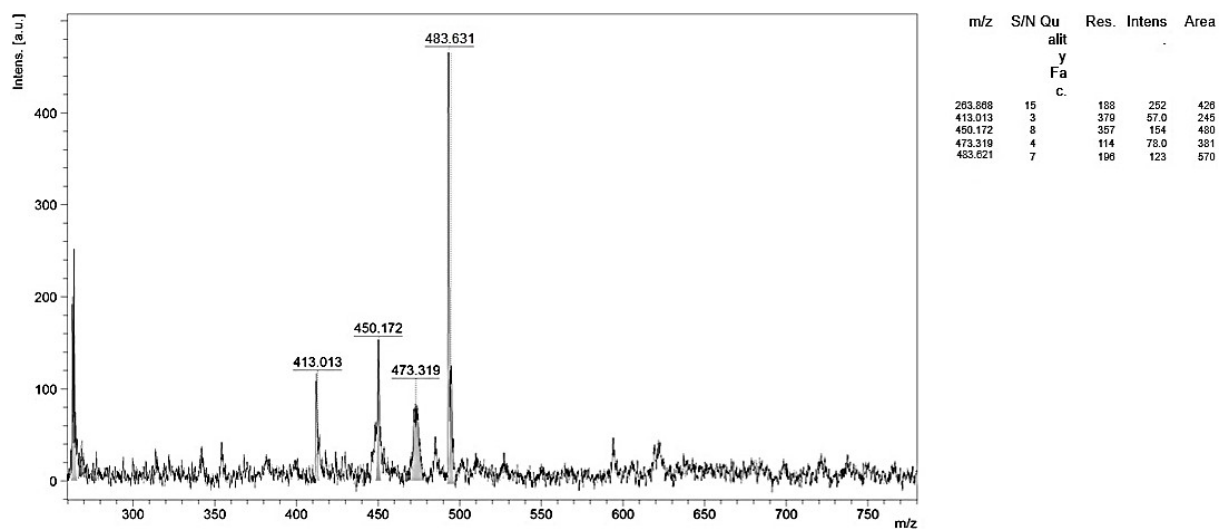

Figure S6. HR-Mass spectra of  $N^2, N^4, N^6$ -tris(4-(aminomethyl) benzyl)-1,3,5-triazine-2,4,6-triamine (2a).

### S1-3. TPT/TAT (3a)

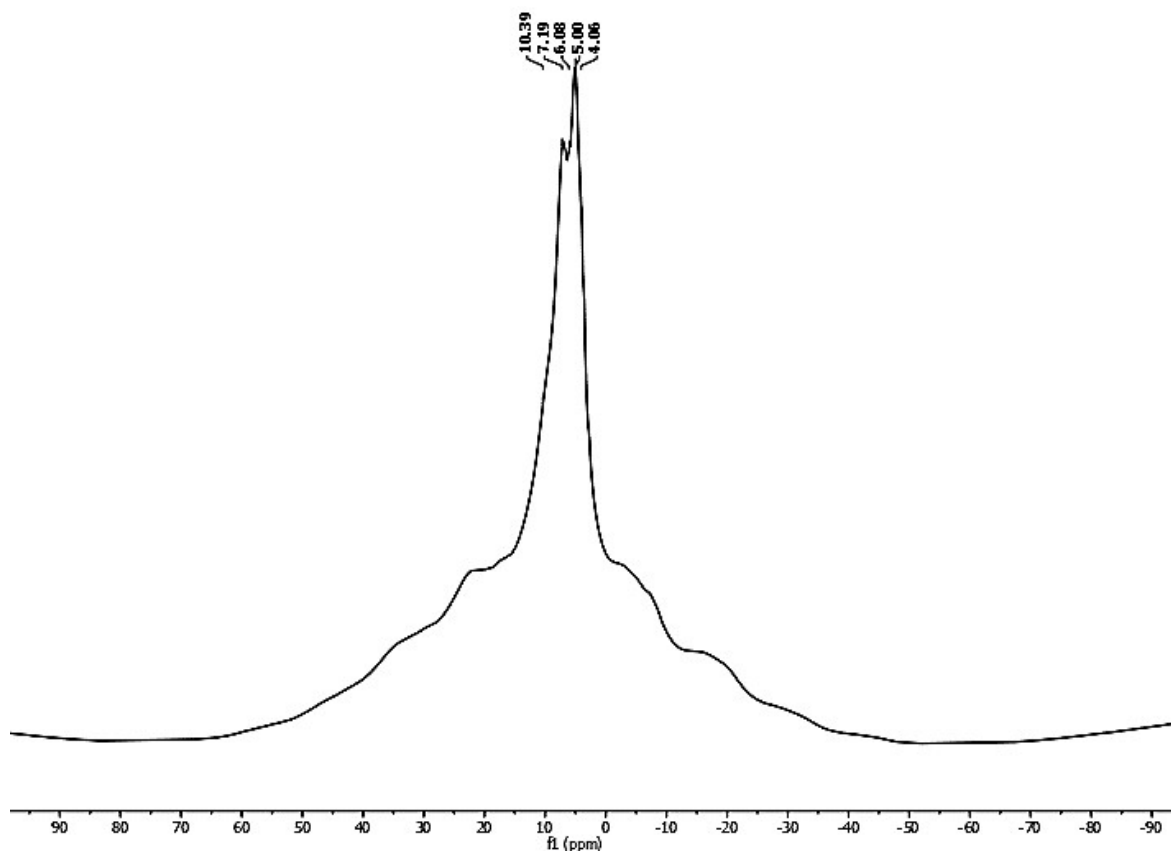

**Figure S7.** <sup>1</sup>H-SSNMR spectra of covalent triazine framework (TPT-TAT) (3a).

**S2. Copies of FT-IR, NMR and HR-Mass spectra of products (entries 1-8)**

S2-1. 5,10,15,20-Tetraphenylporphyrin (4a)

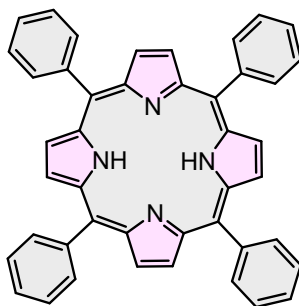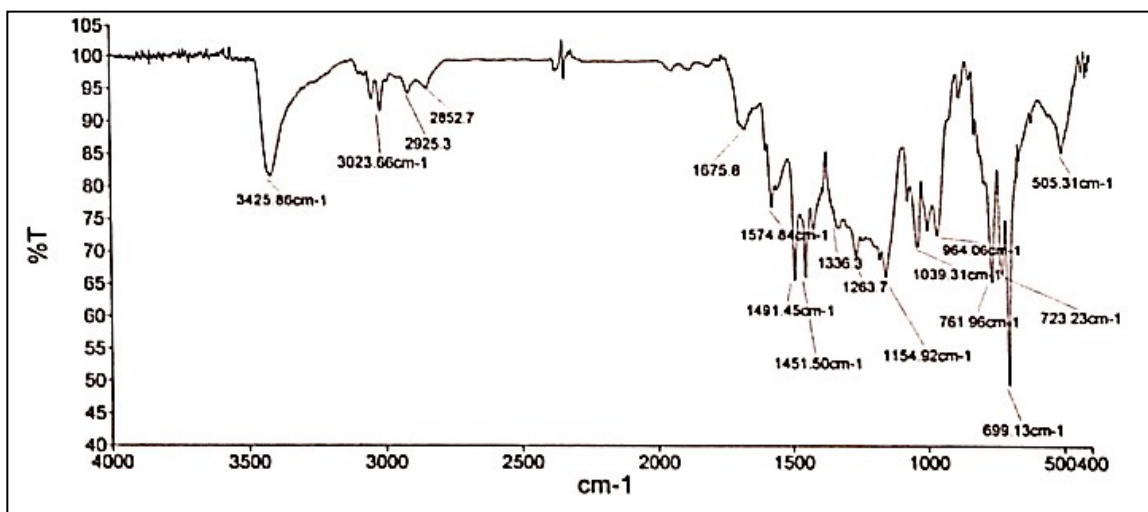

Figure S8. FT-IR spectra of 5,10,15,20-Tetraphenylporphyrin (4a).



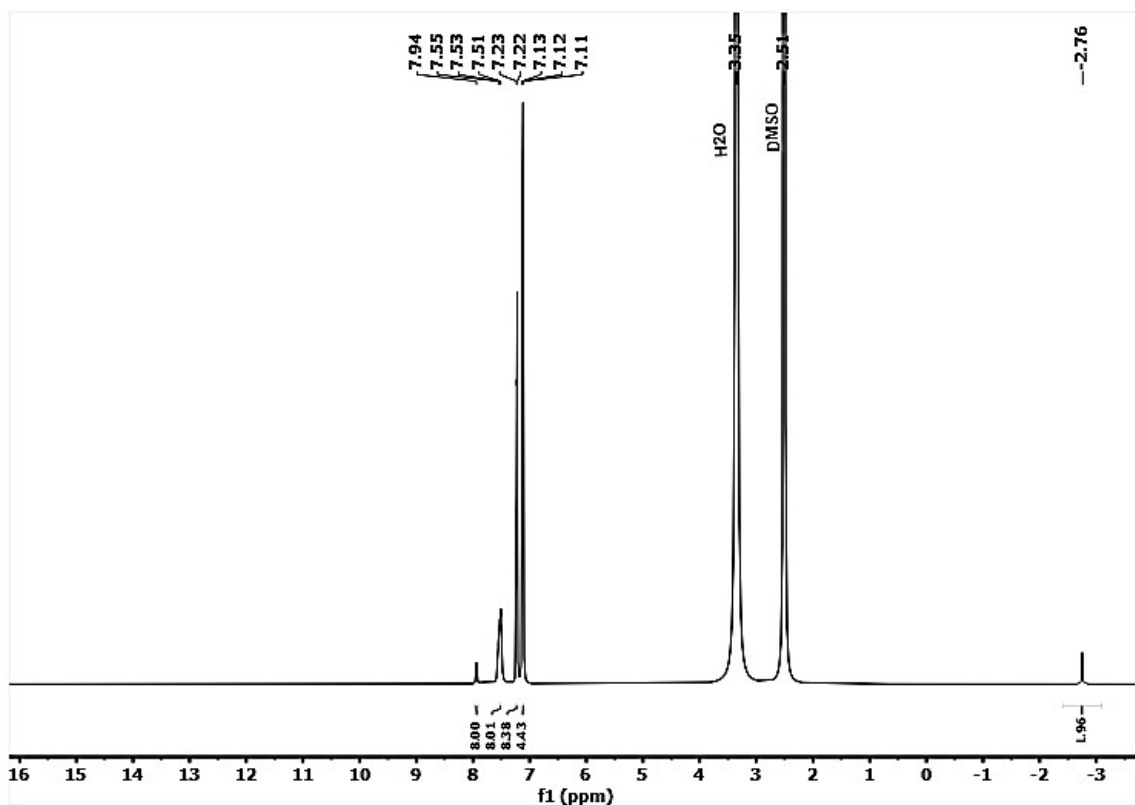

Figure S9. <sup>1</sup>H NMR spectra of 5,10,15,20-Tetraphenylporphyrin (4a).

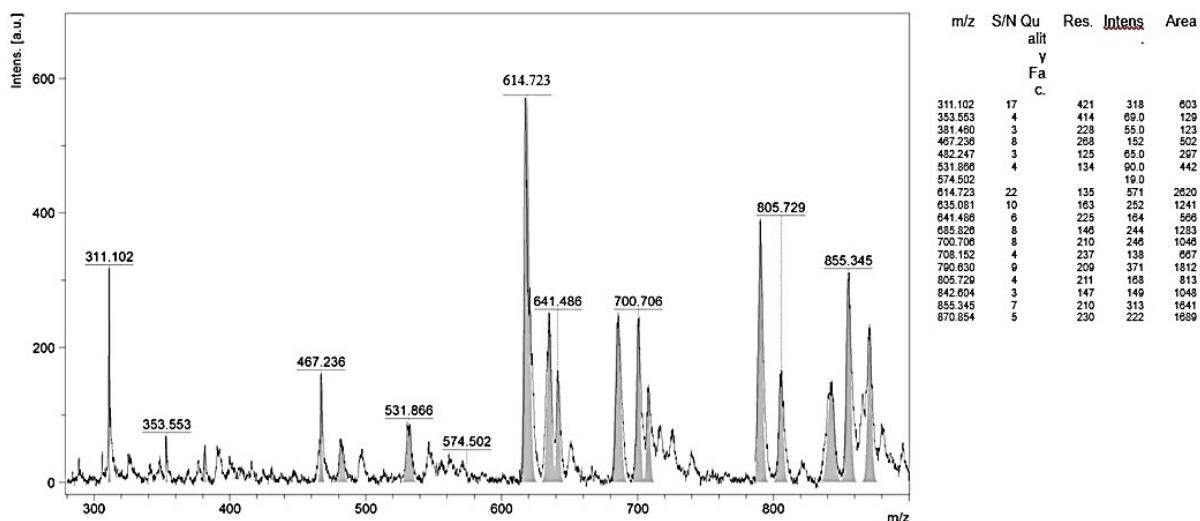

Figure S10. HR-Mass spectra of 5,10,15,20-Tetraphenylporphyrin (4a).

S2-2. 5,10,15,20-Tetrakis(4-methylphenyl)porphyrin (4b)

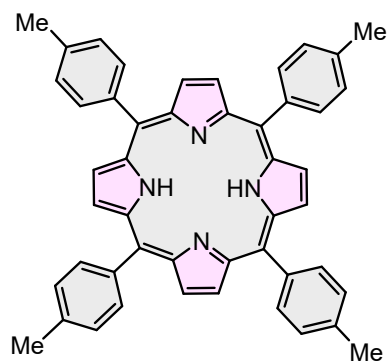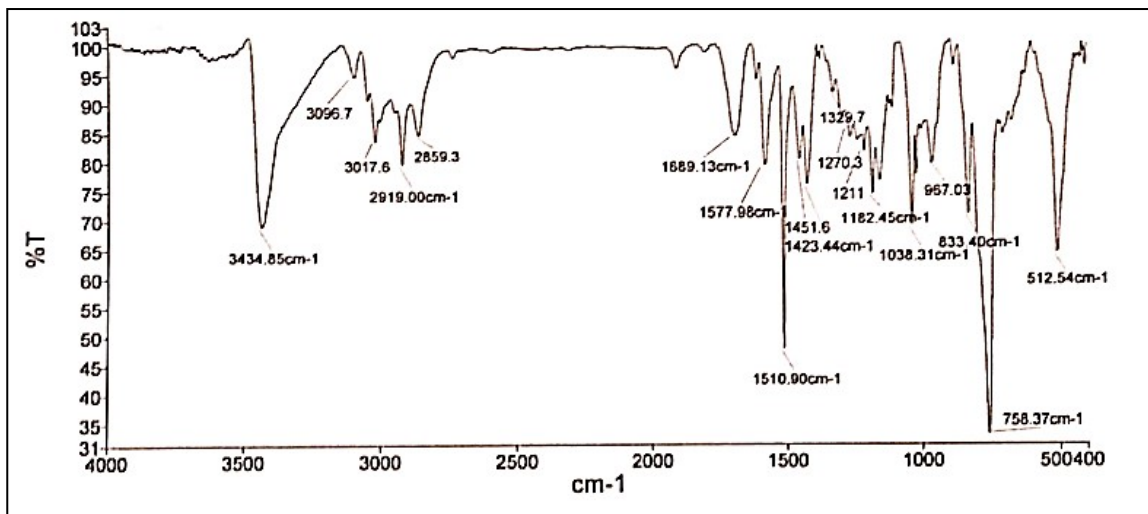

Figure S11. FT-IR spectra of 5,10,15,20-Tetrakis(4-methylphenyl)porphyrin (4b).

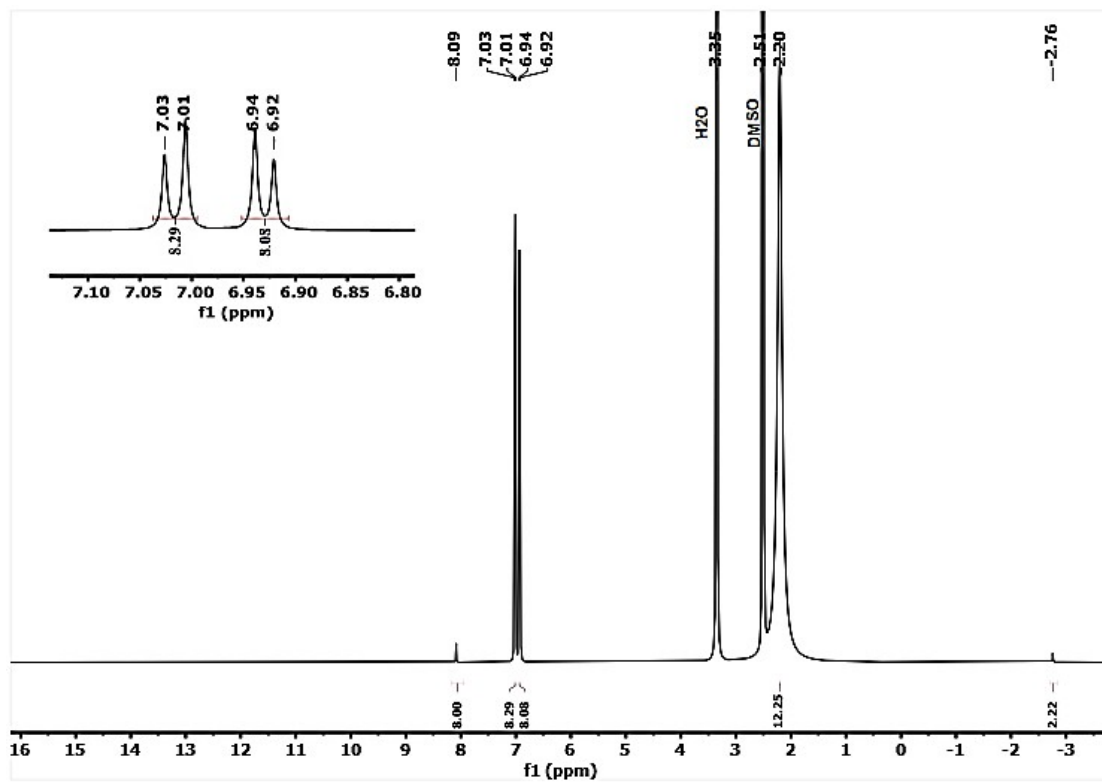

Figure S12.  $^1\text{H}$  NMR spectra of 5,10,15,20-Tetrakis(4-methylphenyl)porphyrin (4b).

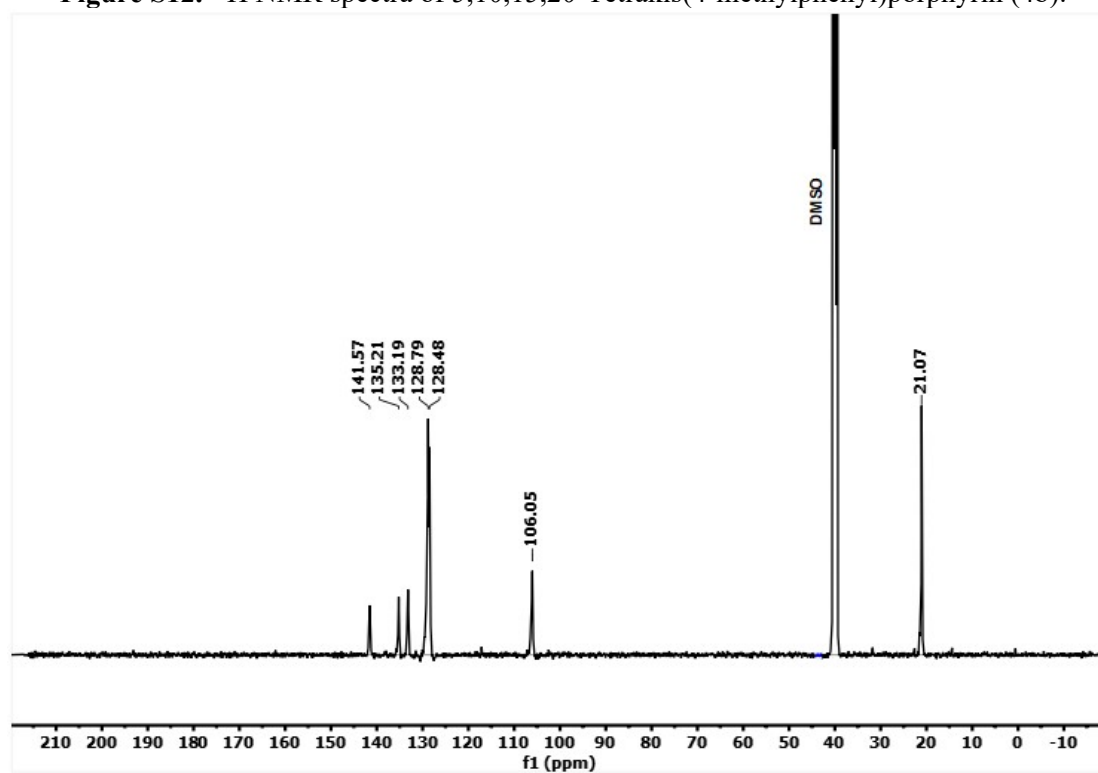

Figure S13.  $^{13}\text{C}$  NMR spectra of 5,10,15,20-Tetrakis(4-methylphenyl)porphyrin (4b).

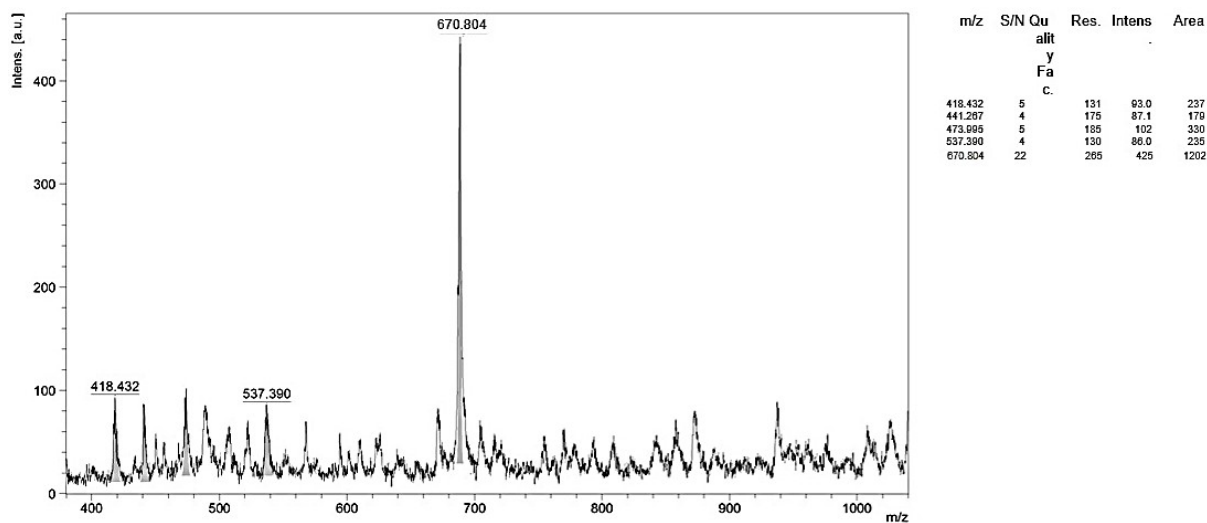

**Figure S14.** HR-Mass spectra of 5,10,15,20-Tetrakis(4-methylphenyl)porphyrin (4b).  
**S2-3.** 5,10,15,20-Tetrakis(4-methoxyphenyl)porphyrin (4c)

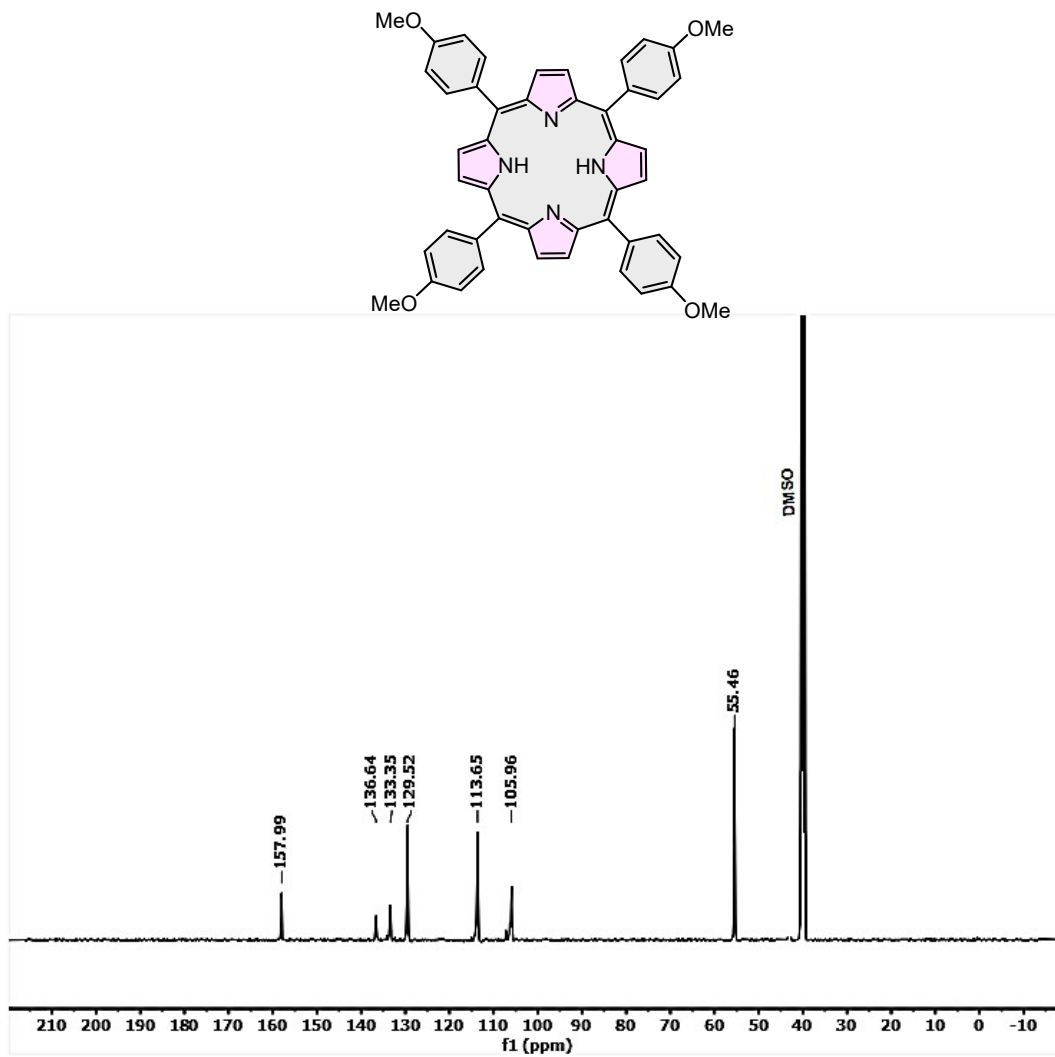

**Figure S15.** <sup>13</sup>C NMR spectra of 5,10,15,20-Tetrakis(4-methoxyphenyl)porphyrin (4c).

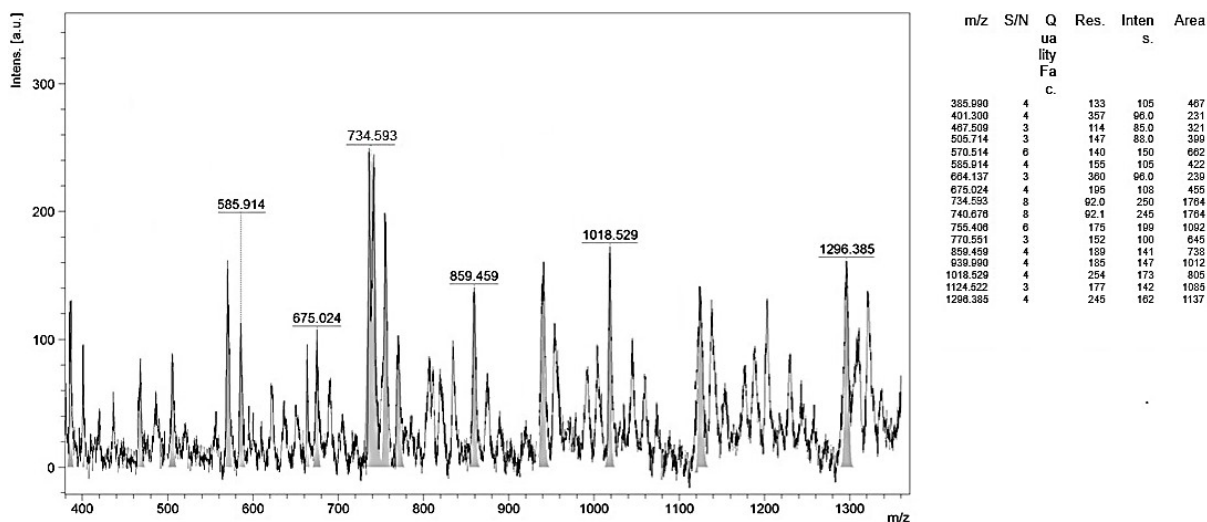

Figure S16. HR-Mass spectra of 5,10,15,20-Tetrakis(4-methoxyphenyl)porphyrin (4c).

S2-4. 5,10,15,20-Tetrakis(4-chlorophenyl)porphyrin (4d)

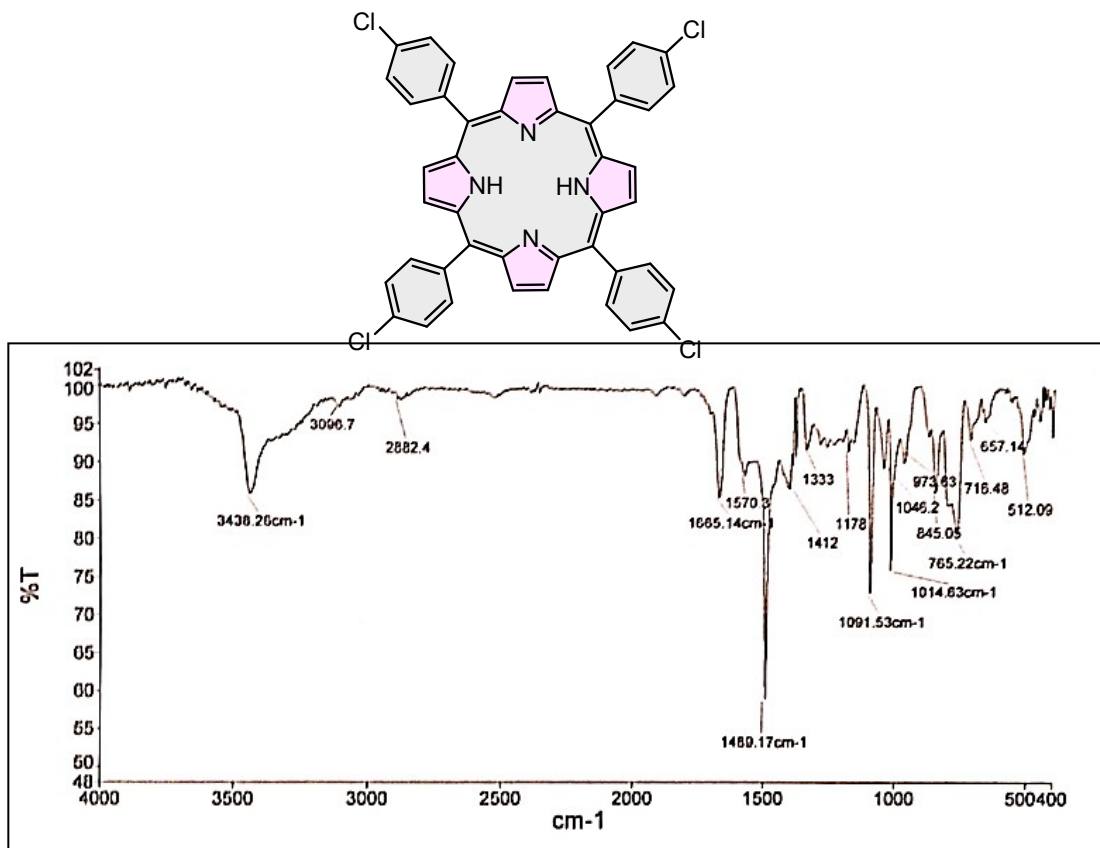

Figure S17. FT-IR spectra of 5,10,15,20-Tetrakis(4-chlorophenyl)porphyrin (4d).

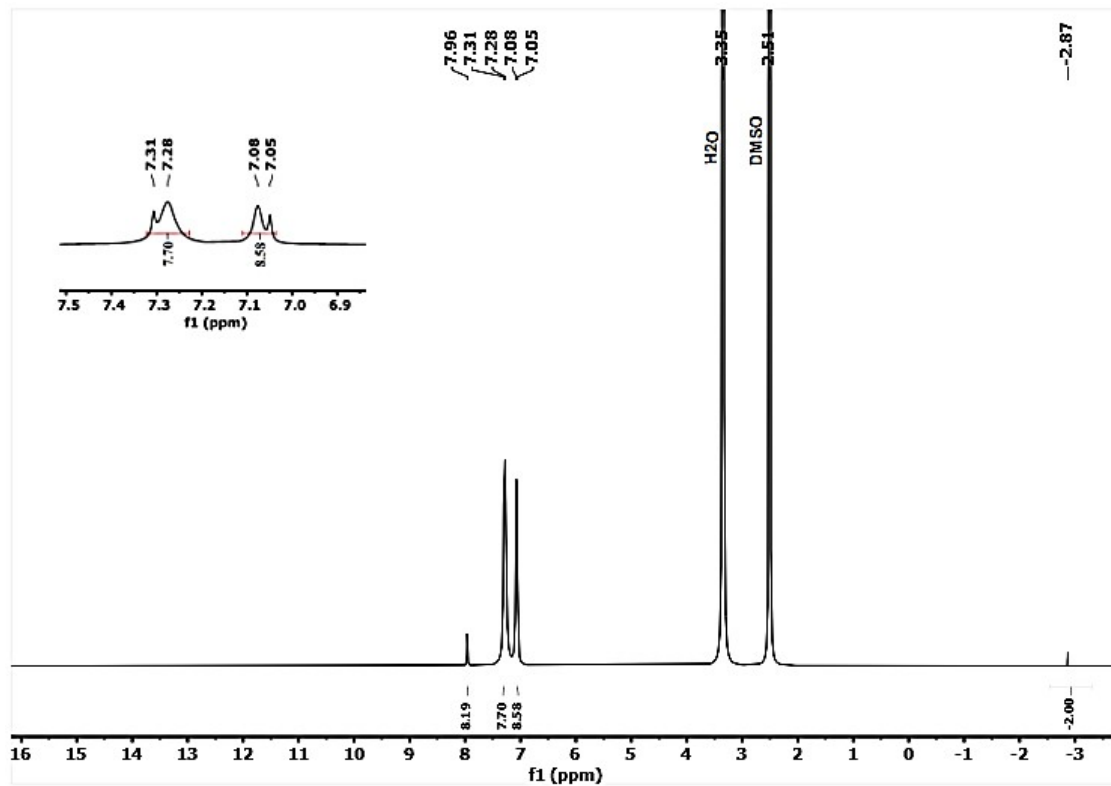

Figure S18.  $^1\text{H}$  NMR spectra of 5,10,15,20-Tetrakis(4-chlorophenyl)porphyrin (4d).

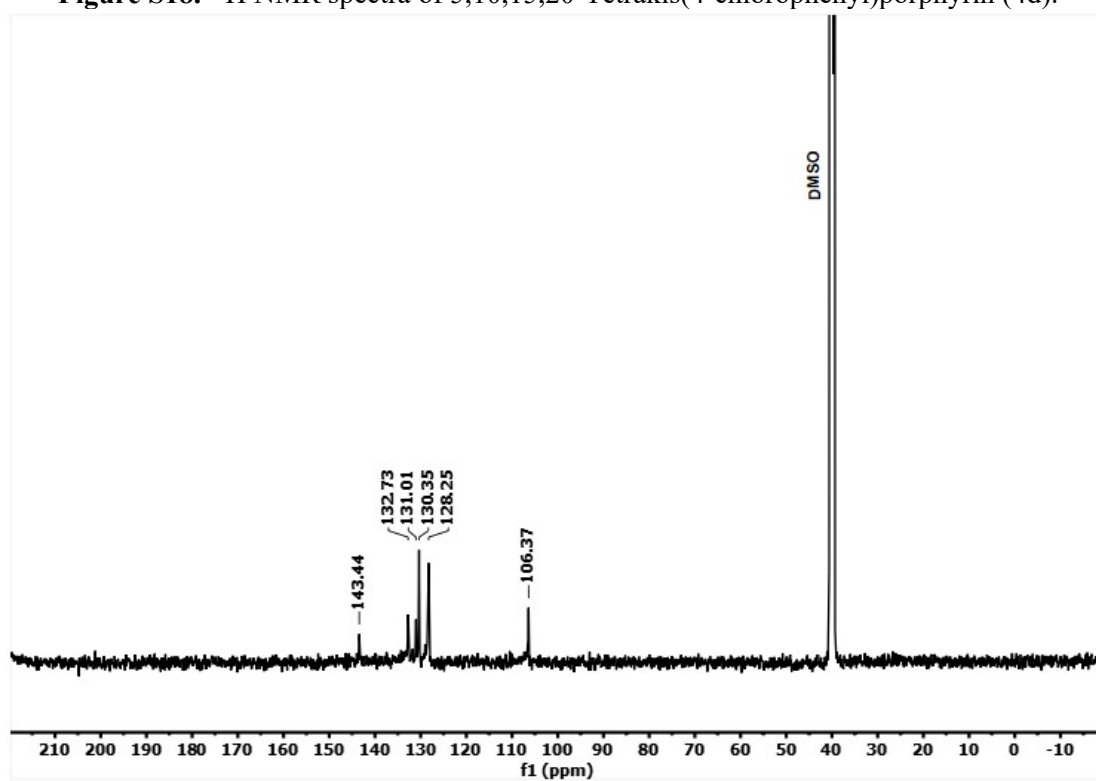

Figure S19.  $^{13}\text{C}$  NMR spectra of 5,10,15,20-Tetrakis(4-chlorophenyl)porphyrin (4d).

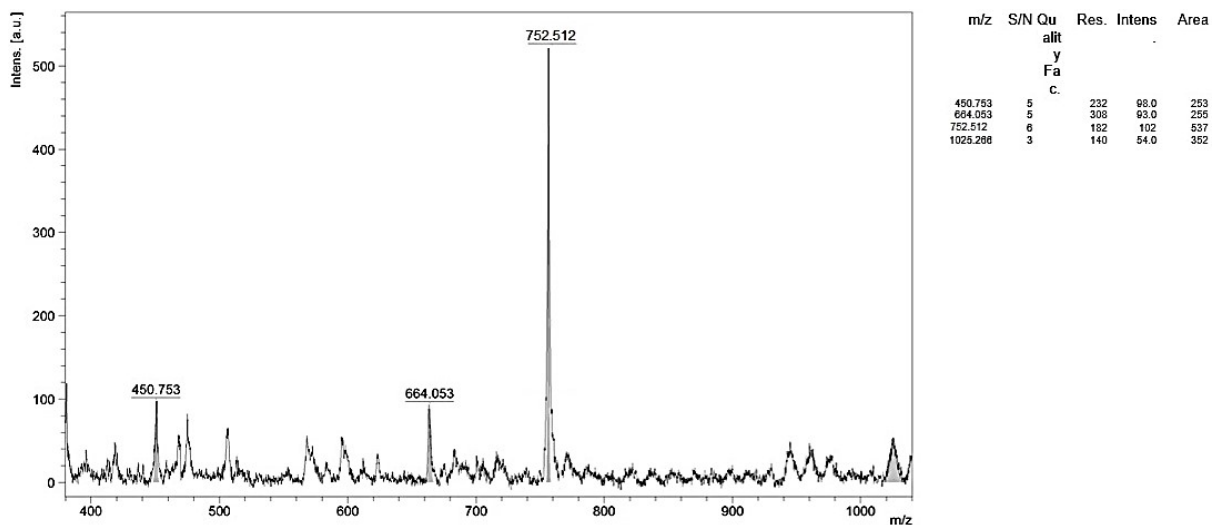

Figure S20. HR-Mass spectra of 5,10,15,20-Tetrakis(4-chlorophenyl)porphyrin (4d).

### S2-5. 5,10,15,20-Tetrakis(2,4-dichlorophenyl)porphyrin (4e)

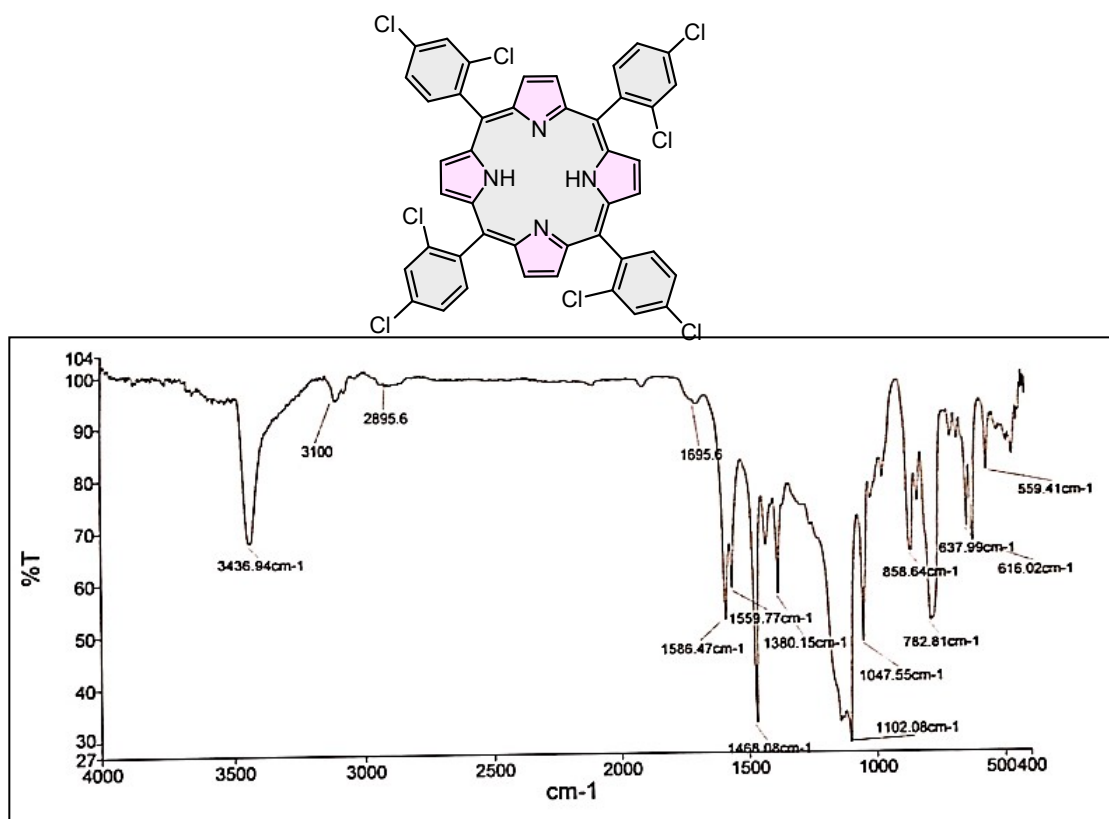

Figure S21. FT-IR spectra of 5,10,15,20-Tetrakis(2,4-dichlorophenyl)porphyrin (4e).

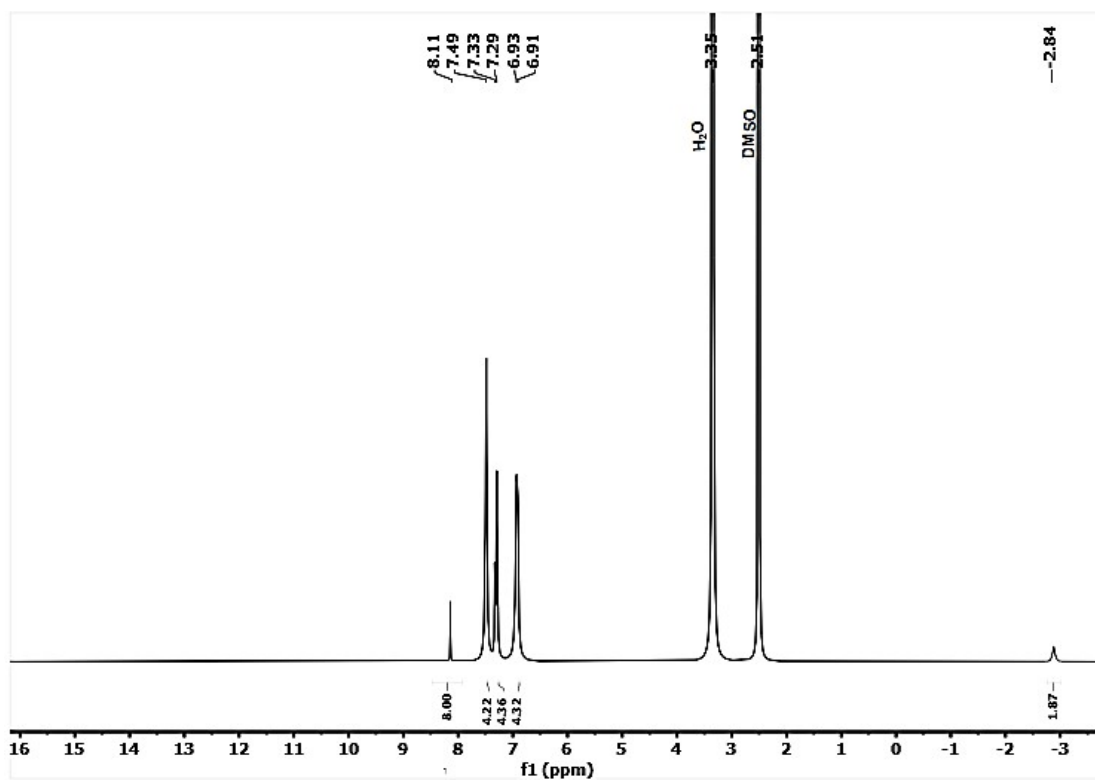

Figure S22. <sup>1</sup>H NMR spectra of 5,10,15,20-Tetrakis(2,4-dichlorophenyl)porphyrin (4e).

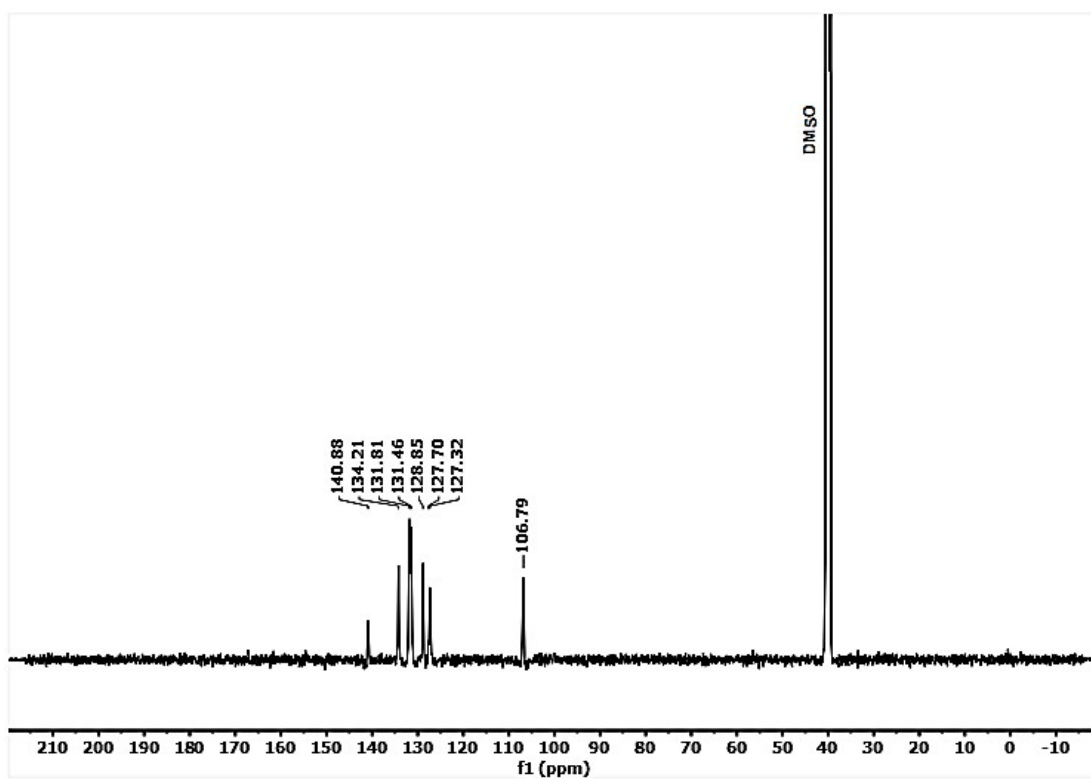

Figure S23. <sup>13</sup>C NMR spectra of 5,10,15,20-Tetrakis(2,4-dichlorophenyl)porphyrin (4e).



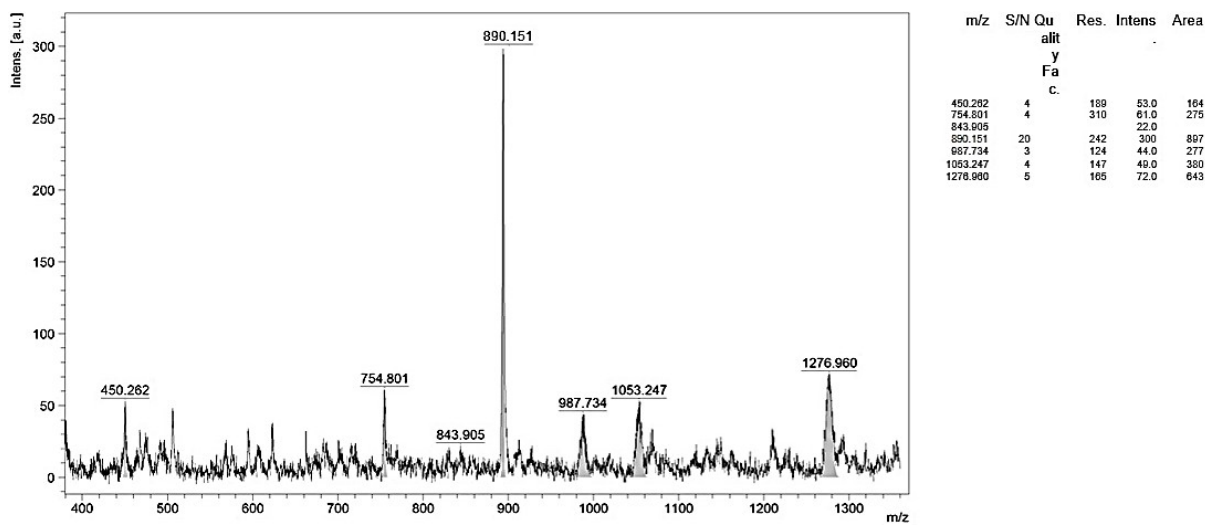

Figure S24. HR-Mass spectra of 5,10,15,20-Tetrakis(2,4-dichlorophenyl)porphyrin (4e).

S2-6. 5,10,15,20-tetra(thiophen-2-yl)porphyrin (4f)

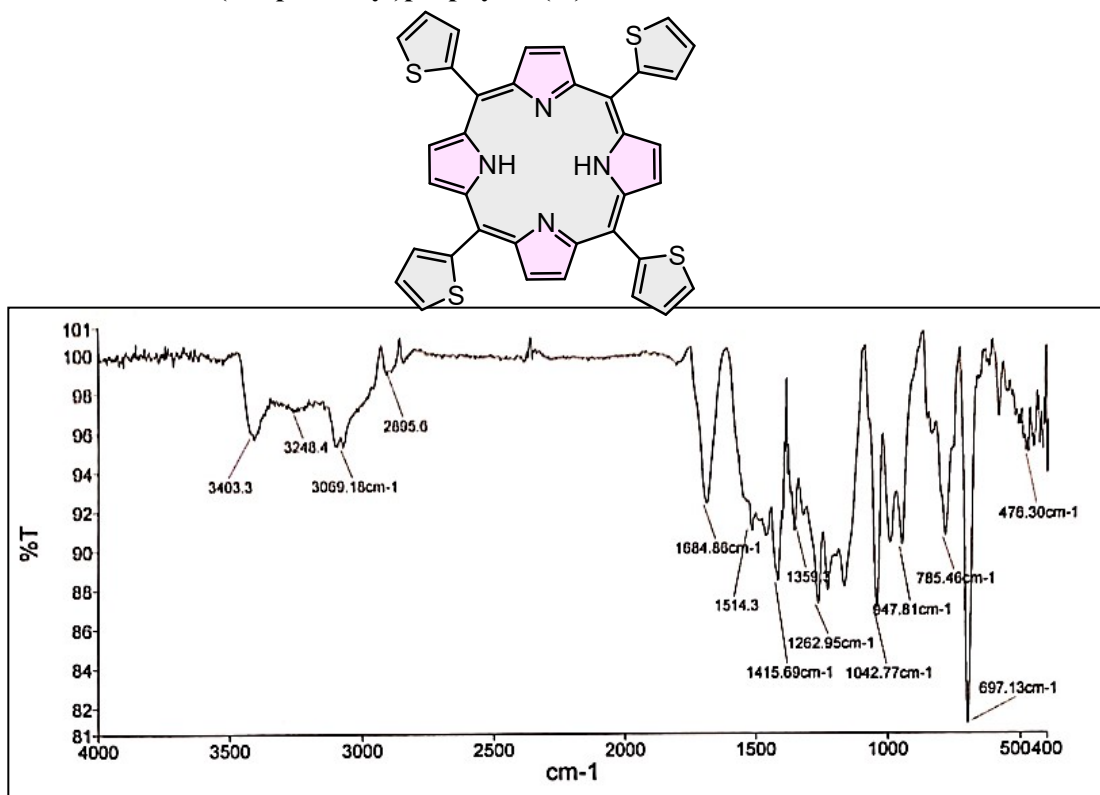

Figure S25. FT-IR spectra of 5,10,15,20-tetra(thiophen-2-yl)porphyrin (4f).

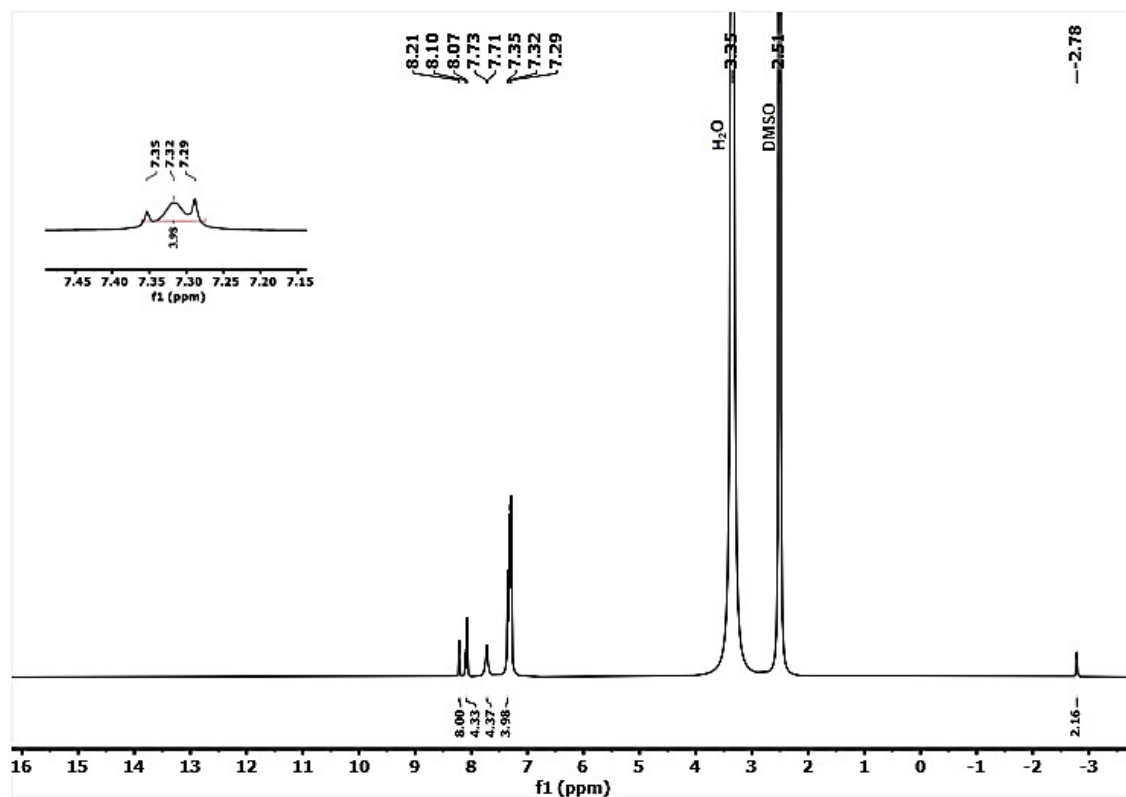

Figure S26. <sup>1</sup>H NMR spectra of 5,10,15,20-tetra(thiophen-2-yl)porphyrin (4f).

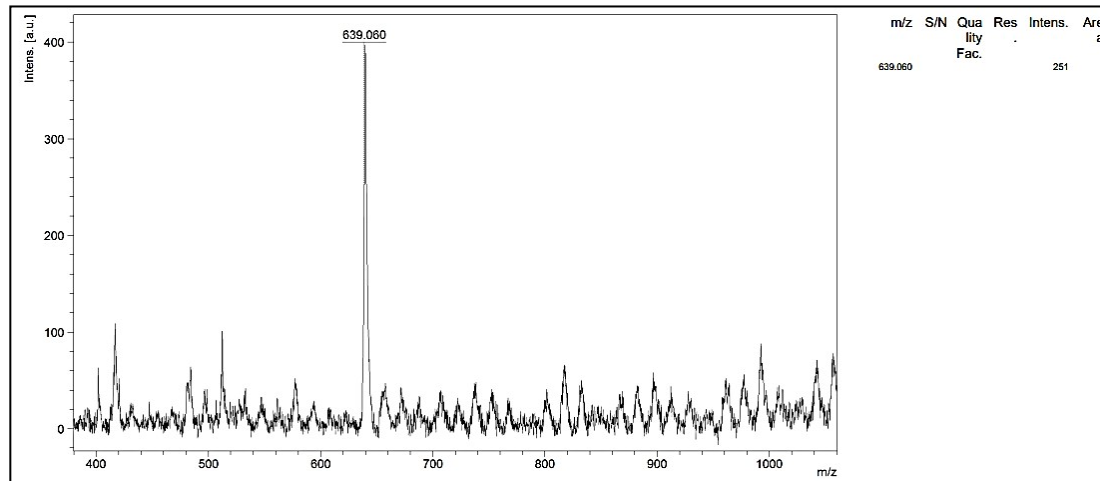

Figure S27. HR-Mass spectra of 5,10,15,20-tetra(thiophen-2-yl)porphyrin (4f).

S2-7. 5,10,15,20-tetra(pyridin-2-yl)porphyrin (3g)

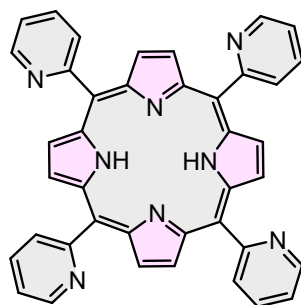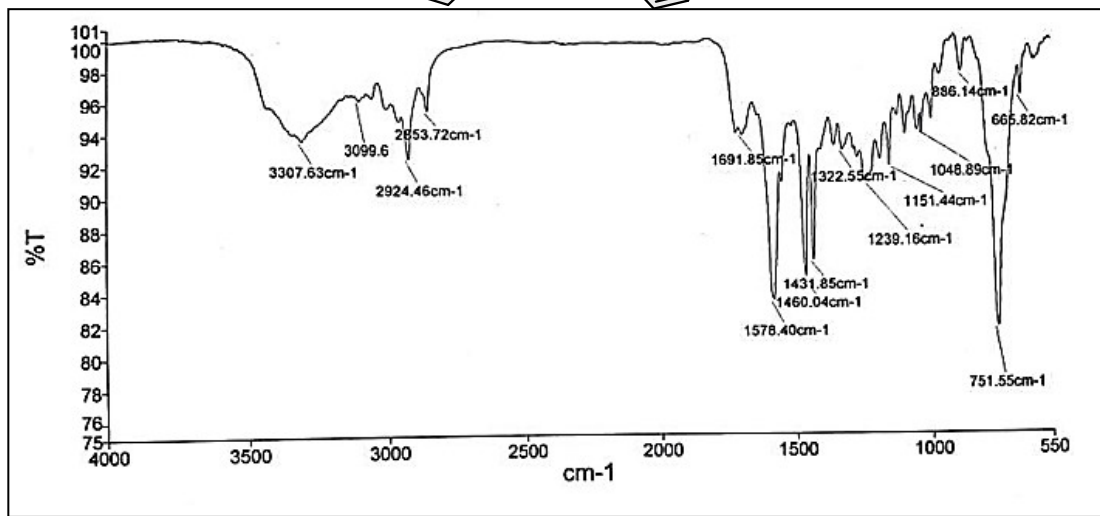

Figure S28. FT-IR spectra of 5,10,15,20-tetra(pyridin-2-yl)porphyrin (4g).

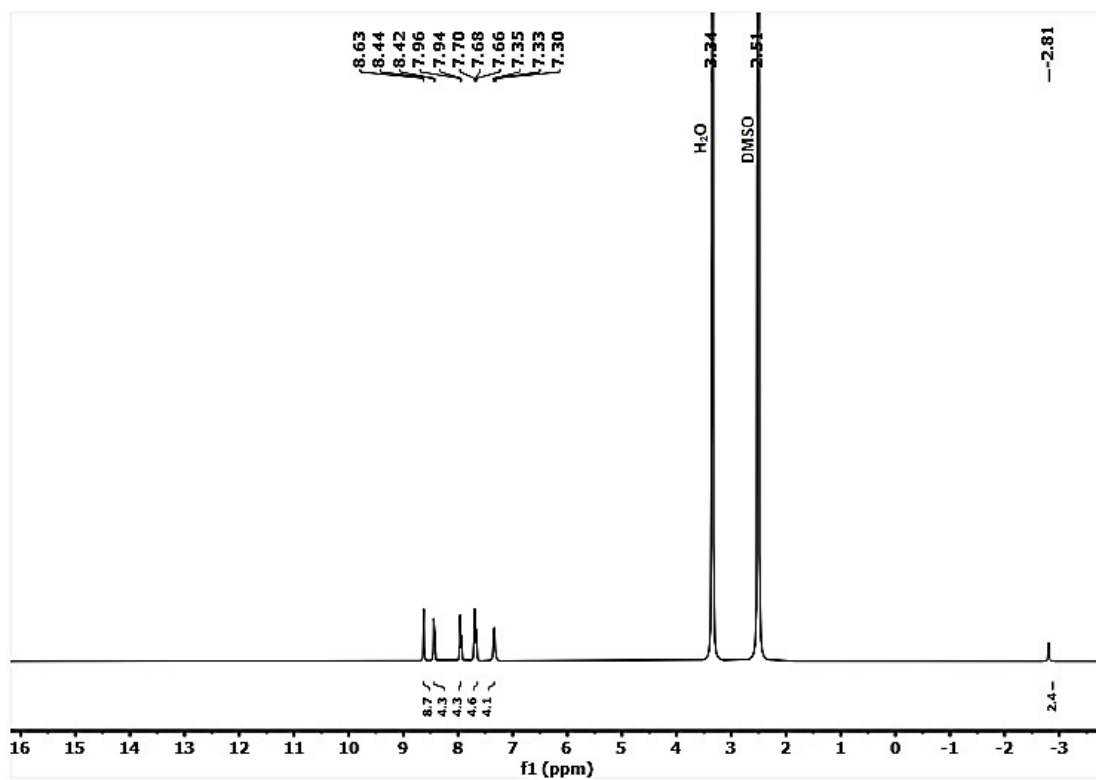

Figure S29. <sup>1</sup>H NMR spectra of 5,10,15,20-tetra(pyridin-2-yl)porphyrin (4g).

S2-8. porphyrin-5,10,15,20-tetra(tetrakis(benzene-4,1-diyl) tetrakis(4-methylbenzenesulfonate)) (4h)

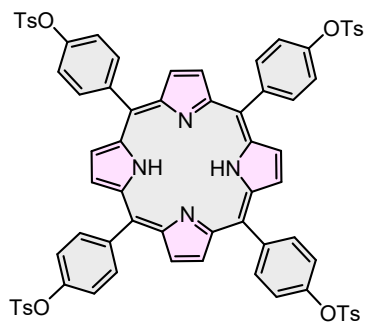

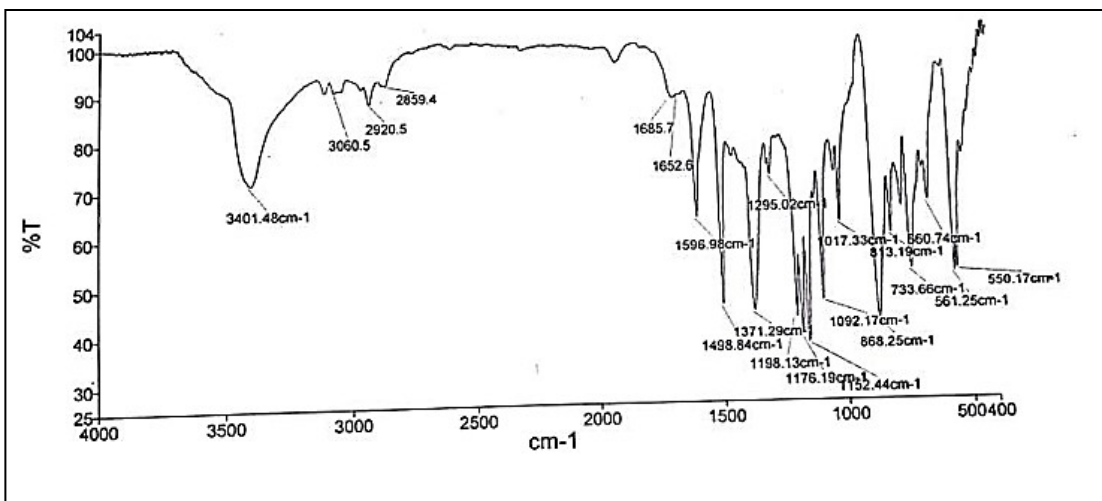

**Figure S30.** FT-IR spectra of porphyrin-5,10,15,20-tetrayltetrakis(benzene-4,1-diyl) tetrakis(4-methylbenzenesulfonate) (4h).

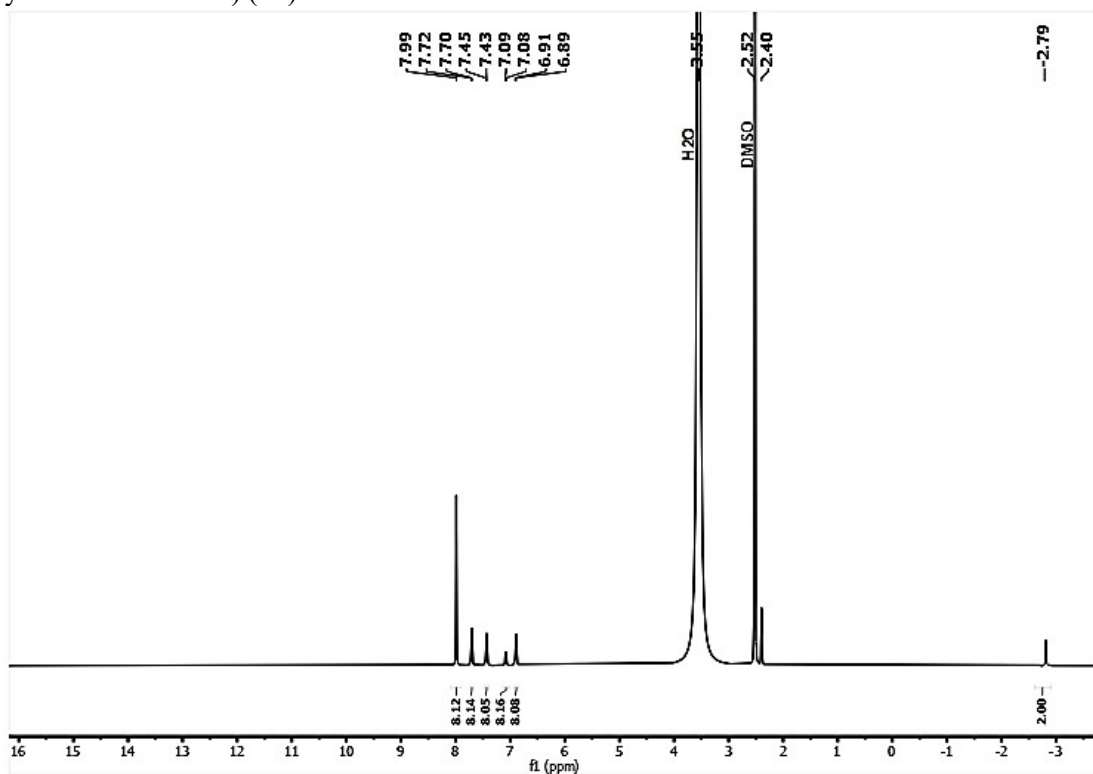

**Figure S31.**  $^1\text{H}$  NMR spectra of porphyrin-5,10,15,20-tetrayltetrakis(benzene-4,1-diyl) tetrakis(4-methylbenzenesulfonate) (4h).

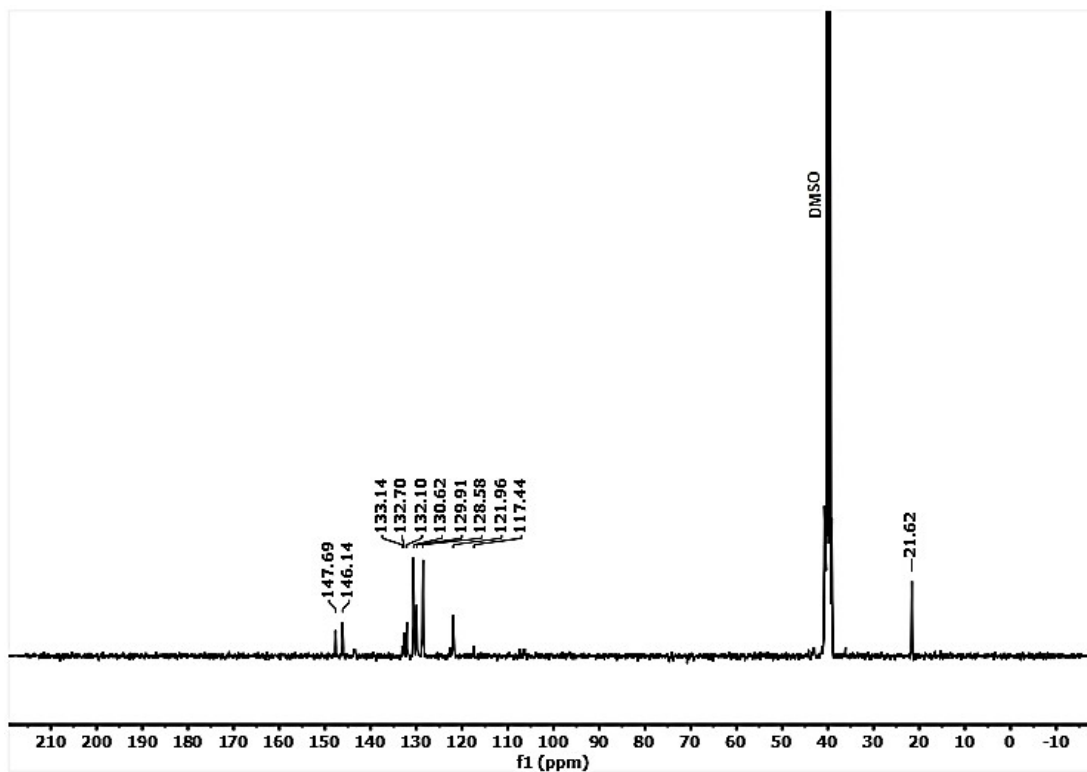

**Figure S32.**  $^{13}\text{C}$ NMR spectra of porphyrin-5,10,15,20-tetraoltetrakis(benzene-4,1-diyl) tetrakis(4-methylbenzenesulfonate) (4h).

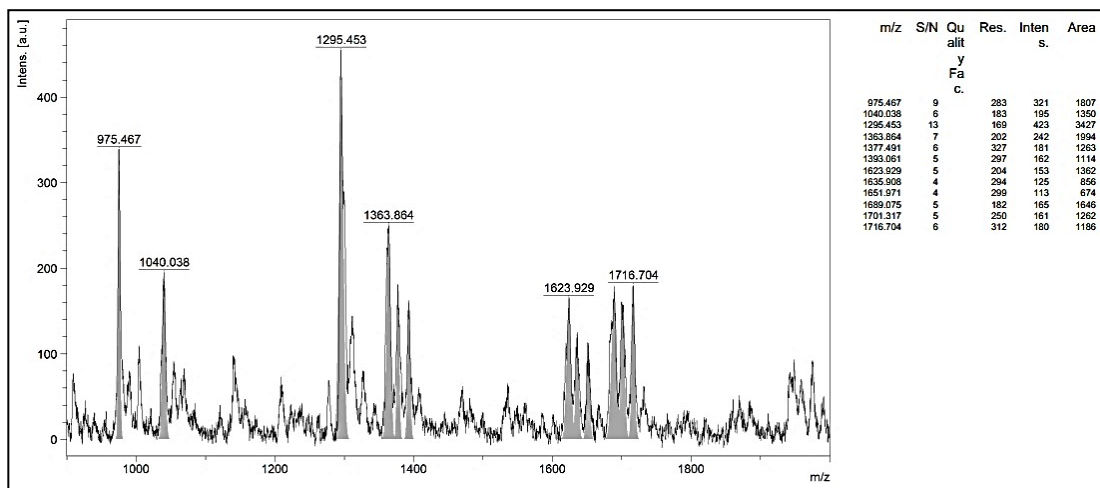

**Figure S33.** HR-Mass spectra of porphyrin-5,10,15,20-tetraoltetrakis(benzene-4,1-diyl) tetrakis(4-methylbenzenesulfonate) (4h).
